# Supplementary material for: Characterization and Gene Expression of Vitellogenesis-Related Transcripts in the Hepatopancreas and Ovary of the Red Swamp Crayfish, Procambarus clarkii (Girard, 1852), during Reproductive Cycle
Source: MDPI journal article supplement (doi:10.3390/d13090445), 2021-09-16
Supplement: s1 [file s1]

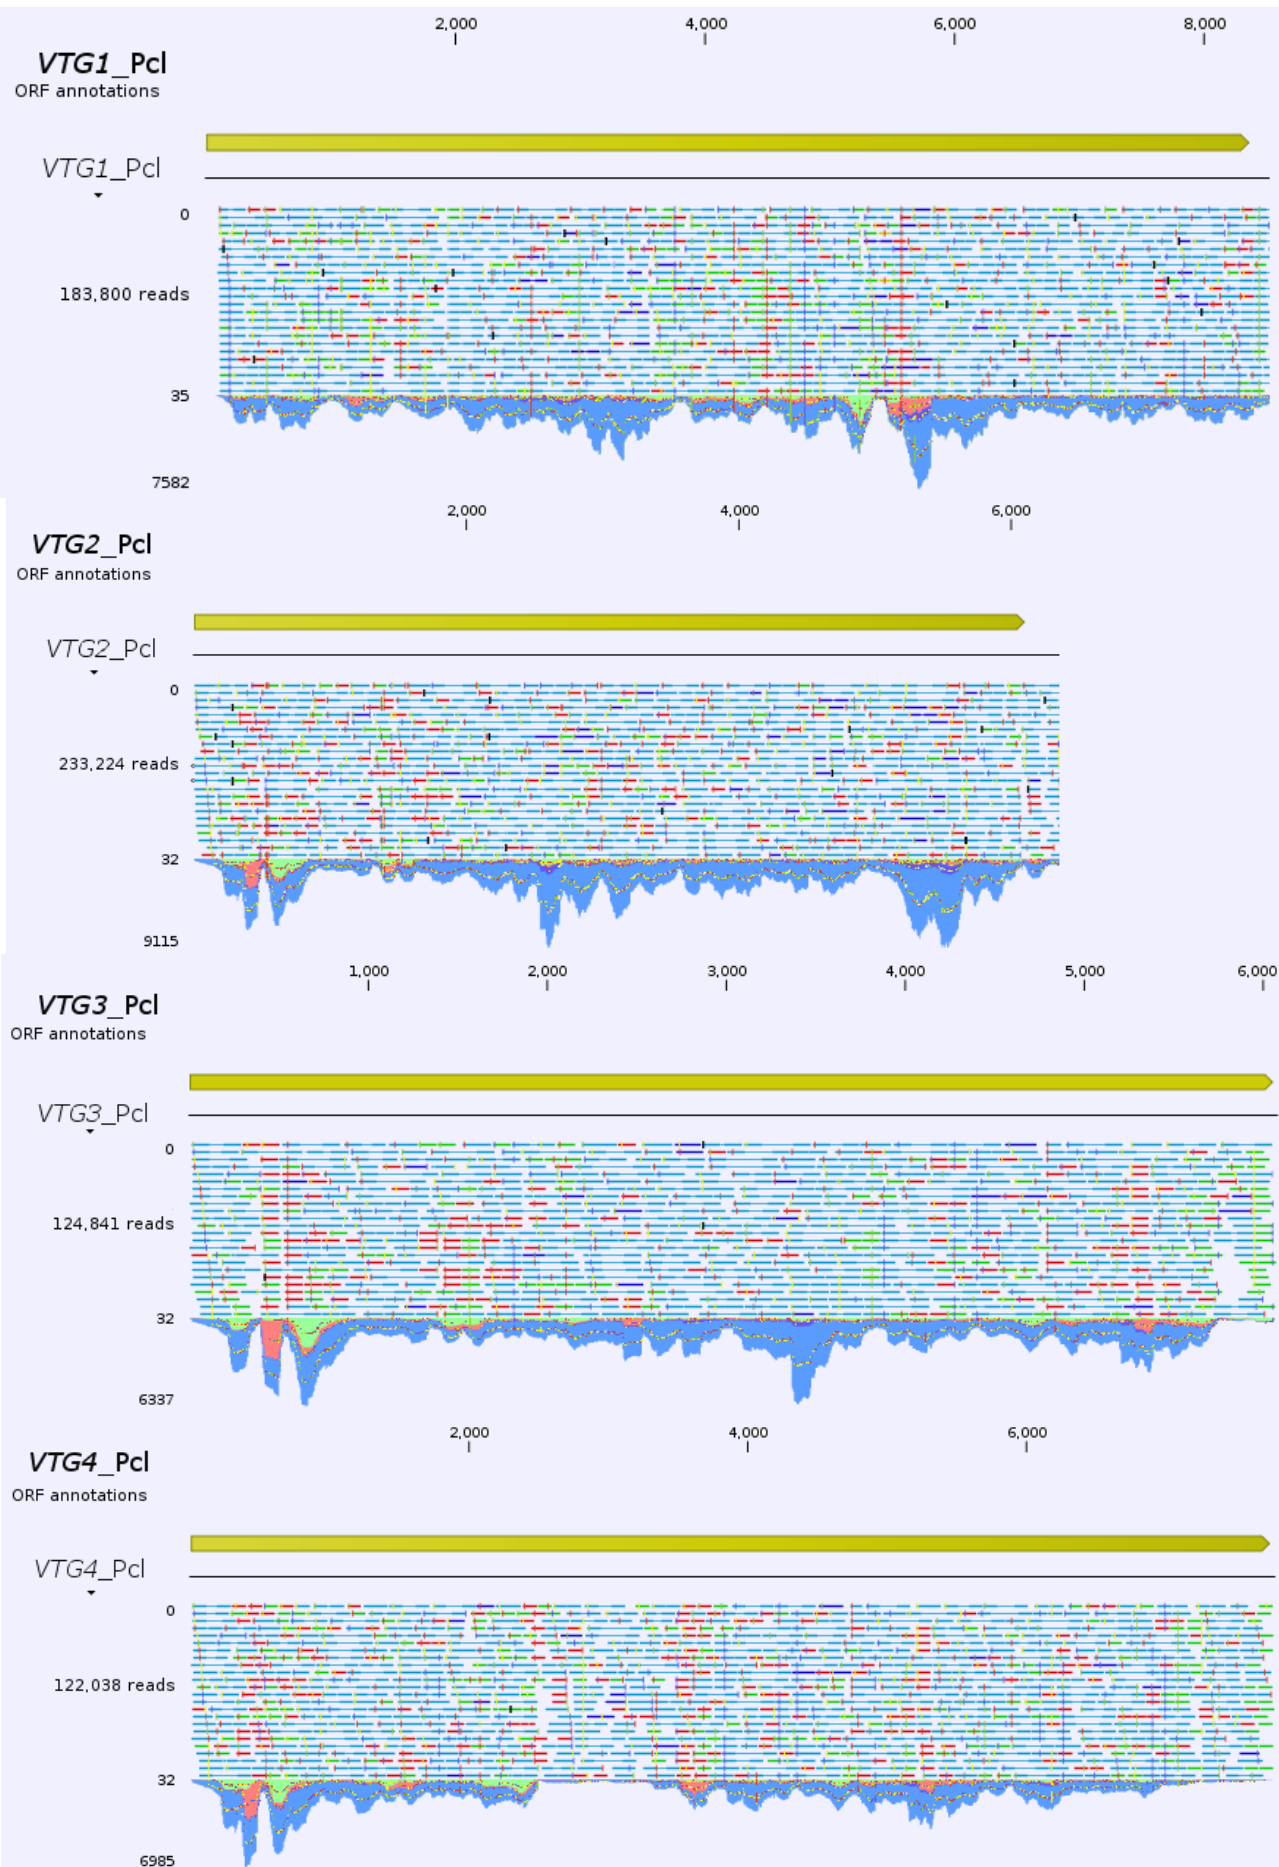

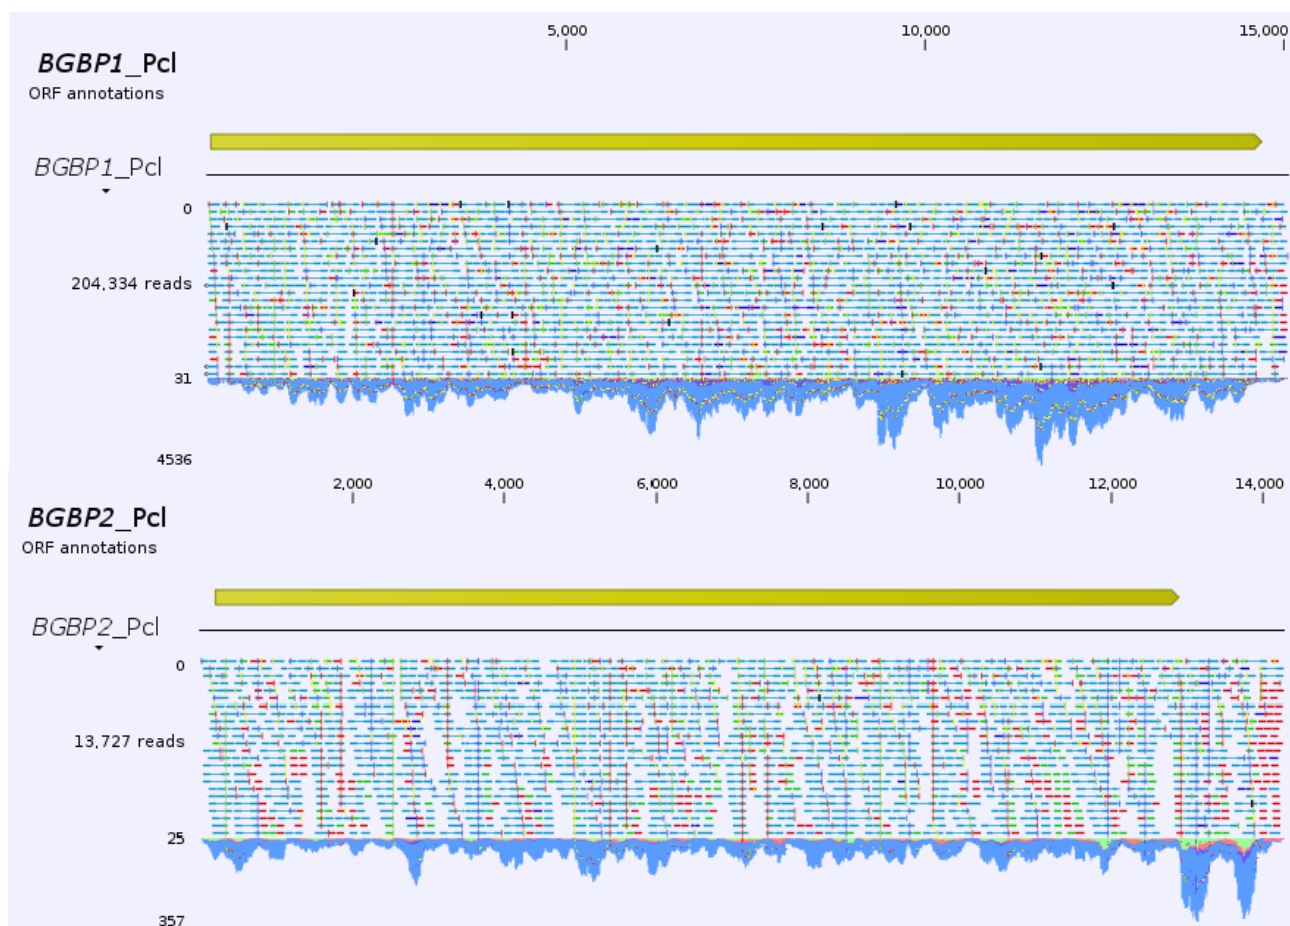

**Figure S1.** Tracks of each reconstructed VTG and VTG-like (BGBP1 and 2) of *P. clarkii*. In yellow is shown the Open Reading Frame (ORF) and the bars represents the reads mapping each transcript. Blue: paired-end reads, Red: Reverse unpaired reads, Green: Forward unpair reads (Images from CLC Workbench v12, edited with GIMP 2.8.18).

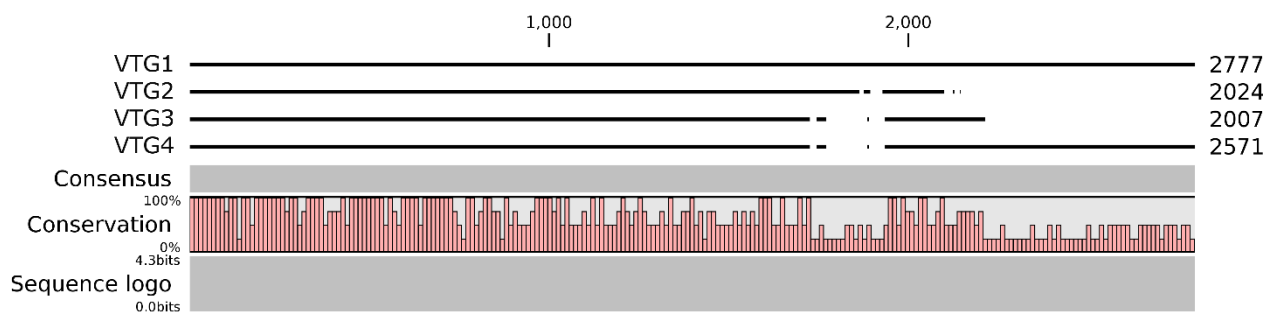

**Figure S2.** Schematic alignment of the 4 VTGs retrieved from the ATLAS of *P. clarkii*. Lengths in aminoacid are provided at the end of each peptide.
