# Supplementary material for: Characterization and Gene Expression of Vitellogenesis-Related Transcripts in the Hepatopancreas and Ovary of the Red Swamp Crayfish, Procambarus clarkii (Girard, 1852), during Reproductive Cycle
Source: MDPI journal article supplement (doi:10.3390/d13090445), 2021-09-16
Supplement: s1 [file s1]

Archive with 1 entries (1 files):
- diversity-1354618-supplementary.pdf
